# Supplementary material for: A methylene-bis-triazolium ligand precursor in an unusual rearrangement of norbornadiene to nortricyclylElectronic supplementary information (ESI) available: 1H and 13C{1H} NMR data for 3a and 3b. See http://www.rsc.org/suppdata/cc/b2/b210726k/
Source: Royal Society of Chemistry journal article supplement (doi:10.1039/b210726k), 2002-12-17
Supplement: b210726k.doc [file b210726k.doc]

**A methylene-bis-triazolium ligand precursor in an unusual rearrangement of norbornadiene to nortricyclyl.**

**Jose A. Mata,a,b Eduardo Peris,b Christopher Incarvitoa and Robert H. Crabtree*a**

Electronic Supplementary Information.

1H NMR Spectrum for **3a**:  (ppm) 8.05 (s, 1H, Tz); 8.04 (s, 1H, Tz); 6.39 (s, 2H, NCH2N); 4.58 - 4.34 (m, 4H, NCH2; n-Bu), 2.87 (d, 1H, 2JH-Rh = 3.2 Hz, ntc); 1.99 (s, 3H, CH3COO); 1.97 - 1.86 (m, 4H, CH2; n-Bu); 1.54 (br s, 1H, ntc-CH); 1.51 - 1.46 (m, 4H, CH2; n-Bu); 1.18 (d, 1H, 2JH-H = 10.0 Hz, ntc-CH2); 1.08 (d, 1H, 2JH-H = 10.0 Hz, ntc-CH2); 1.01 (t, 7H, 3JH-H = 7.6 Hz, CH3 + ntc-CHcyclopropyl); 0.86 - 0.82 (m, 2H, ntc-CHcyclopropyl + ntc-CH2); 0.76 (t, 1H, 3JH-H = 5.2 Hz, ntc-CHcyclopropyl); 0.22 (d, 1H, 2JH-H = 10.0 Hz, ntc-CH2).

13C{1H} NMR Spectrum,  (ppm) 189.0 (1C, Cq, CO); 171.2 (d, 1C, Cq, 1JC-Rh = 53.6, Ccarbene); 170.1 (d, 1C, Cq, JC-Rh = 53.9, Ccarbene); 143.9 (1C, CH, Tz); 143.8 (1C, CH, Tz); 65.9 (1C, CH2, NCH2N); 52.4 (d, 1C, CH, JC-Rh = 26.0 Hz, Calkyl-ntc); 48.5, 48.3 (2C, CH2, NCH2 n-Bu); 36.8 (1C, CH, ntc); 34.1, 32.9 (2C, CH2, ntc); 32.7, 32.5 (2C, CH2, n-Bu); 25.8 (1C, CH3, CH3COO); 20.6, 20.5 (2C, CH2, n-Bu); 18.2, 13.3, 13.2 (3C, CH, ntc-cyclopropyl).

1H NMR Spectrum for **3b**:  (ppm) 7.71 (s, 1H, Tz); 7.69 (s, 1H, Tz); 7.56 - 7.52 (m, 4H, Ph); 7.46 - 7.39 (m, 6H, Ph); 6.44 (s, 2H, NCH2N); 5.91 (d, 1H, 2JH-H = 14.8 Hz, CH2); 5.83 (d, 1H, 2JH-H = 14.4 Hz, CH2); 5.48 (d, 1H, 2JH-H = 14.4 Hz, CH2); 5.46 (d, 1H, 2JH-H = 14.8 Hz, CH2); 2.92 (d, 1H, 2JH-Rh = 3.2 Hz, ntc); 2.00 (s, 3H, CH3COO); 1.72 (br s, 1H, ntc-CH); 1.24 (d, 1H, 2JH-H = 10.0 Hz, ntc-CH2); 1.16 (d, 1H, 2JH-H = 8.9 Hz, ntc-CH2); 1.07 (t, 1H, 3JH-H = 5.2 Hz, ntc-CHcyclopropyl); 0.98 (d, 1H, 2JH-H = 10.0 Hz, ntc-CH2); 0.95 (t, 1H, 3JH-H = 5.4 Hz, ntc-CHcyclopropyl); 0.87 (t, 1H, 3JH-H = 5.2 Hz, ntc-CHcyclopropyl); 0.56 (d, 1H, 2JH-H = 9.6 Hz, ntc-CH2).

13C{1H} NMR Spectrum,  (ppm) 189.2 (1C, Cq CO); 170.9 (d, 1C, Cq, 1JC-Rh = 53.3, Ccarbene); 170.6 (d, 1C, Cq, JC-Rh = 53.6, Ccarbene); 143.8 (1C, CH, Tz); 143.7 (1C, CH, Tz);134.6, 134.4 (2C, Cq, Ph); 130.5, 130.3, 129.8, 129.6, 129.5 (10C, CH, Ph); 65.8 (1C, CH2, NCH2N); 52.6, 52.4 (2C, CH2, Bz); 52.3 (d, 1C, CH, JC-Rh = 25.7 Hz, Calkyl-ntc); 36.8 (1C, CH, ntc); 33.9, 32.75 (2C, CH2, ntc); 25.6 (1C, CH3, CH3COO); 18.2, 13.3, 13.2 (3C, CH, ntc-cyclopropyl).
